# Supplementary material
Source: MDPI journal article supplement (https://www.mdpi.com/2227-9717/9/2/324)
Supplement: s1 [file s1]

Supplementary Materials

# mAb Production Modeling and Design Space Evaluation Including Glycosylation Process

Ou Yang <sup>1</sup> and Marianthi Ierapetritou <sup>2,\*</sup>

<sup>1</sup> Department of Chemical and Biochemical Engineering, Rutgers—The State University of New Jersey, Piscataway, NJ 08854-8058, USA; oy21@scarletmail.rutgers.edu

<sup>2</sup> Department of Chemical and Biomolecular Engineering, University of Delaware, Newark, DE 19716-3196, USA; mgi@udel.edu

\* Correspondence: mgi@udel.edu; Tel.: 302-831-6641

**Citation:** Yang, O.; Ierapetritou, M. mAb Production Modeling and Design Space Evaluation Including Glycosylation Process. *Processes* **2021**, *9*, 324.

<https://doi.org/10.3390/pr9020324>

Academic Editor: Abdollah Koolivand

Received: 3 January 2021

Accepted: 6 February 2021

Published: 9 February 2021

**Publisher's Note:** MDPI stays neutral with regard to jurisdictional claims in published maps and institutional affiliations.

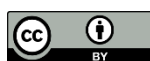

**Copyright:** © 2021 by the authors. Submitted for possible open access publication under the terms and conditions of the Creative Commons Attribution (CC BY) license (<http://creativecommons.org/licenses/by/4.0/>).

### Kinetic model equations [1,2]

The first part is relative to the cell culture which captures viable cell concentration, glucose concentration and mAb concentration.

The mass balances are shown in the following equations.

$$\text{Volume: } \frac{dV}{dt} = F_{in} - F_{out}$$

$$\text{Viable cell: } \frac{d(V[X_v])}{dt} = F_{in}[X_{v0}] + \mu V[X_v] - \mu_d V[X_v] - F_{out}[X_v]$$

$$\text{Dead cell: } \frac{d(V[X_d])}{dt} = F_{in}[X_{d0}] + \mu_d V[X_v] - F_{out}[X_d]$$

$$\text{mAb production: } \frac{dV[mAb]}{dt} = F_{in}[mAb_0] + q_{mAb} V[X_v] - F_{out}[mAb]$$

$$\text{Glucose concentration: } \frac{d(V[glucose])}{dt} = F_{in}[glucose]_{in} - F_{out}[glucose] + q_{glucose} V X_v$$

Cell growth rate, death rate glucose consumption rate and protein productivity are shown below/

$$\text{Cell growth rate: } \mu = \left( \frac{\mu_{max}}{T} + a \right) \left( \frac{C_{Glc}}{K_{Glc} + C_{Glc}} - \frac{[X_v]}{\alpha_x} \right)$$

$$\text{Cell death rate: } \mu_d = \left( \frac{\mu_d^{max}}{T} + b \right) \frac{\left( \frac{K_{d\mu}}{T} + c \right)}{\left( \frac{K_{d\mu}}{T} + c \right) + \mu}$$

$$\text{Glucose consumption: } q_{Glc} = - \frac{1}{\left( \frac{Y_{XGlc}}{T} + d \right)} \frac{[C_{Glc}]}{[C_{Glc}] + K_{Glc}}$$

$$\text{Protein productivity: } q_{mAb} = \left( \frac{Y_{mAb}}{T} + e \right) q_{Glc} \exp \left[ - \frac{1}{2} \left( \frac{pH_{shift} - pH_{opt}}{w} \right)^2 \right]$$

The second part of the model is relative to protein glycosylation. Mass balance is shown in the equation below.

$$\frac{\partial [G_m]}{\partial t} = -V_1 \frac{\partial [G_m]}{\partial z} + \sum_n^{Enzyme} v_{m,n} r_n$$

$$(V_1)(Vol_{Golgi})[Man9]_{z=0} = \frac{q_p}{MW_{mAb}} \left( \frac{2 \mu mol_{Glyc}}{\mu mol_{mAb}} \right)$$

Three types of reactions exist in the Golgi apparatus that represents the catalytic reactions from different types of enzymes.

$$r_n = \frac{k_{f,n}[E_n][G_m]}{k_{d,n} \left( 1 + \frac{[G_m]}{K_{d,n}} + \frac{[G_{m-1}]}{K_{d,m-1/n}} \right)}$$

$$r_n = \frac{k_{f,n}[E_n][NS_k][G_m]}{K_{d,m/n} K_{d,k/n} \left( 1 + \frac{[NS_k]}{K_{d,k/n}} + \frac{[NS_k]}{K_{d,k/n}} \frac{[G_m]}{K_{d,m/n}} + \frac{[NS_k]}{K_{d,k/n}} \sum_{z=1}^{N.C.} \frac{[G_z]}{K_{d,z/n}} + \frac{B_k}{K_{i,k/n}} \frac{[G_{m+1}]}{K_{d,(m+1)/n}} + \frac{[B_k]}{K_{d,k/n}} \right)}$$

$$r_n = \frac{k_{f,n}[E_n][NS_k][G_m]}{K_{d,n} K_{d,k/n} \left( 1 + \frac{[NS_k]}{K_{d,k/n}} + \frac{[G_m]}{K_{d,n}} + \sum_{z=1}^{N.C.} \frac{[G_z]}{K_{d,z/n}} + \frac{[NS_k]}{K_{d,k/n}} \frac{[G_m]}{K_{d,n}} + \frac{[NS_k]}{K_{d,k/n}} \sum_{z=1}^{N.C.} \frac{[G_z]}{K_{d,z/n}} + \frac{B_k}{K_{i,k/n}} \frac{[G_{m+1}]}{K_{d,(m+1)/n}} + \frac{[G_{m+1}]}{K_{d,(m+1)/n}} + \frac{[B_k]}{K_{d,k/n}} \right)}$$

$$[E_n] = [E_{n,max}] \exp \left[ - \frac{1}{2} \left( \frac{z - z_{n,max}}{\omega_n} \right)^2 \right]$$

$$[E_{n,max}] = a_n \times T + b_n$$

$k_{f,n}$  is the rate-limiting turnover rate for enzyme n.  $[NS_k]$  is nucleotide sugar concentration.  $K_{d,n}$  is the dissociation constant of the acceptor enzyme complex and  $K_{d,k/n}$

is the dissociation constant of the donor enzyme complex.  $K_{d,\frac{z}{n}}$  is the dissociation constant of the competitor enzyme complex,  $[En]$  is enzyme concentration.

### 1. Temperature effect under pH = 6.8

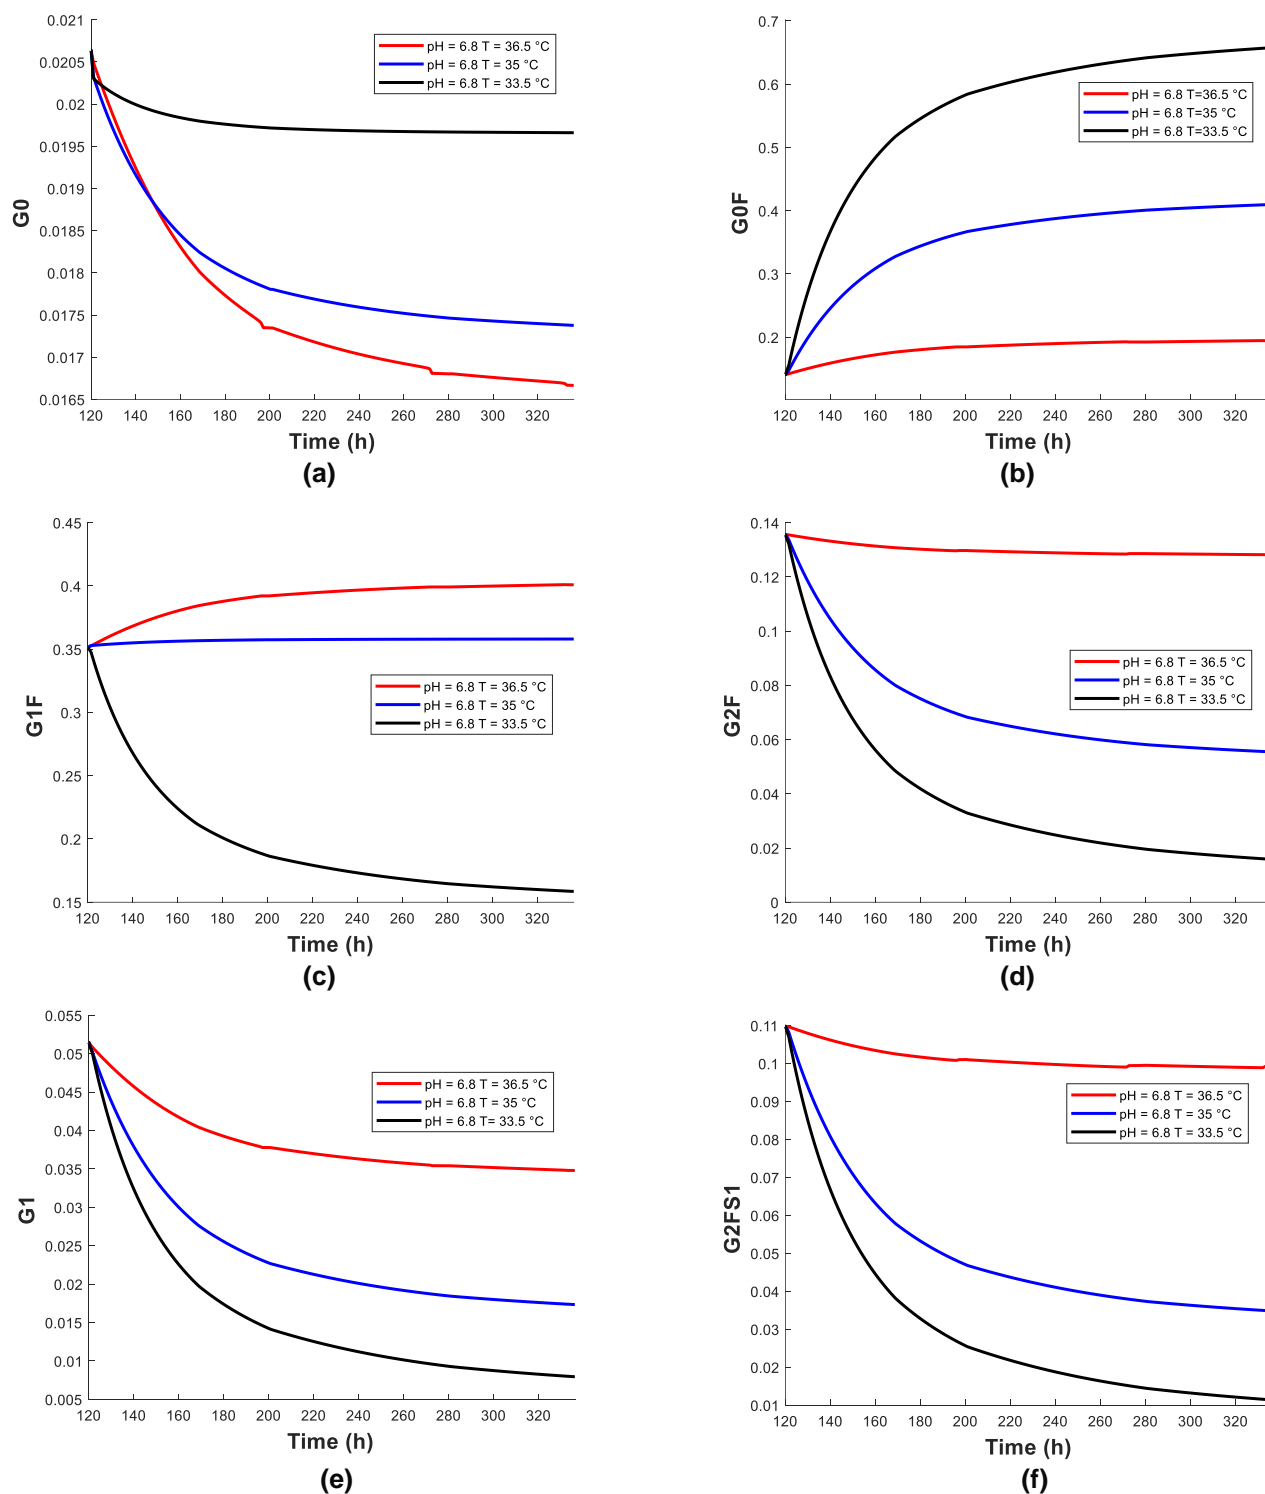

**Figure S1.** Glycan fractions under different temperature (a) G0, (b) G0F, (c) G1F, (d) G2F, (e) G1, (f) G2FS1 (pH = 6.8).

### 2. Temperature effect under pH = 6.9

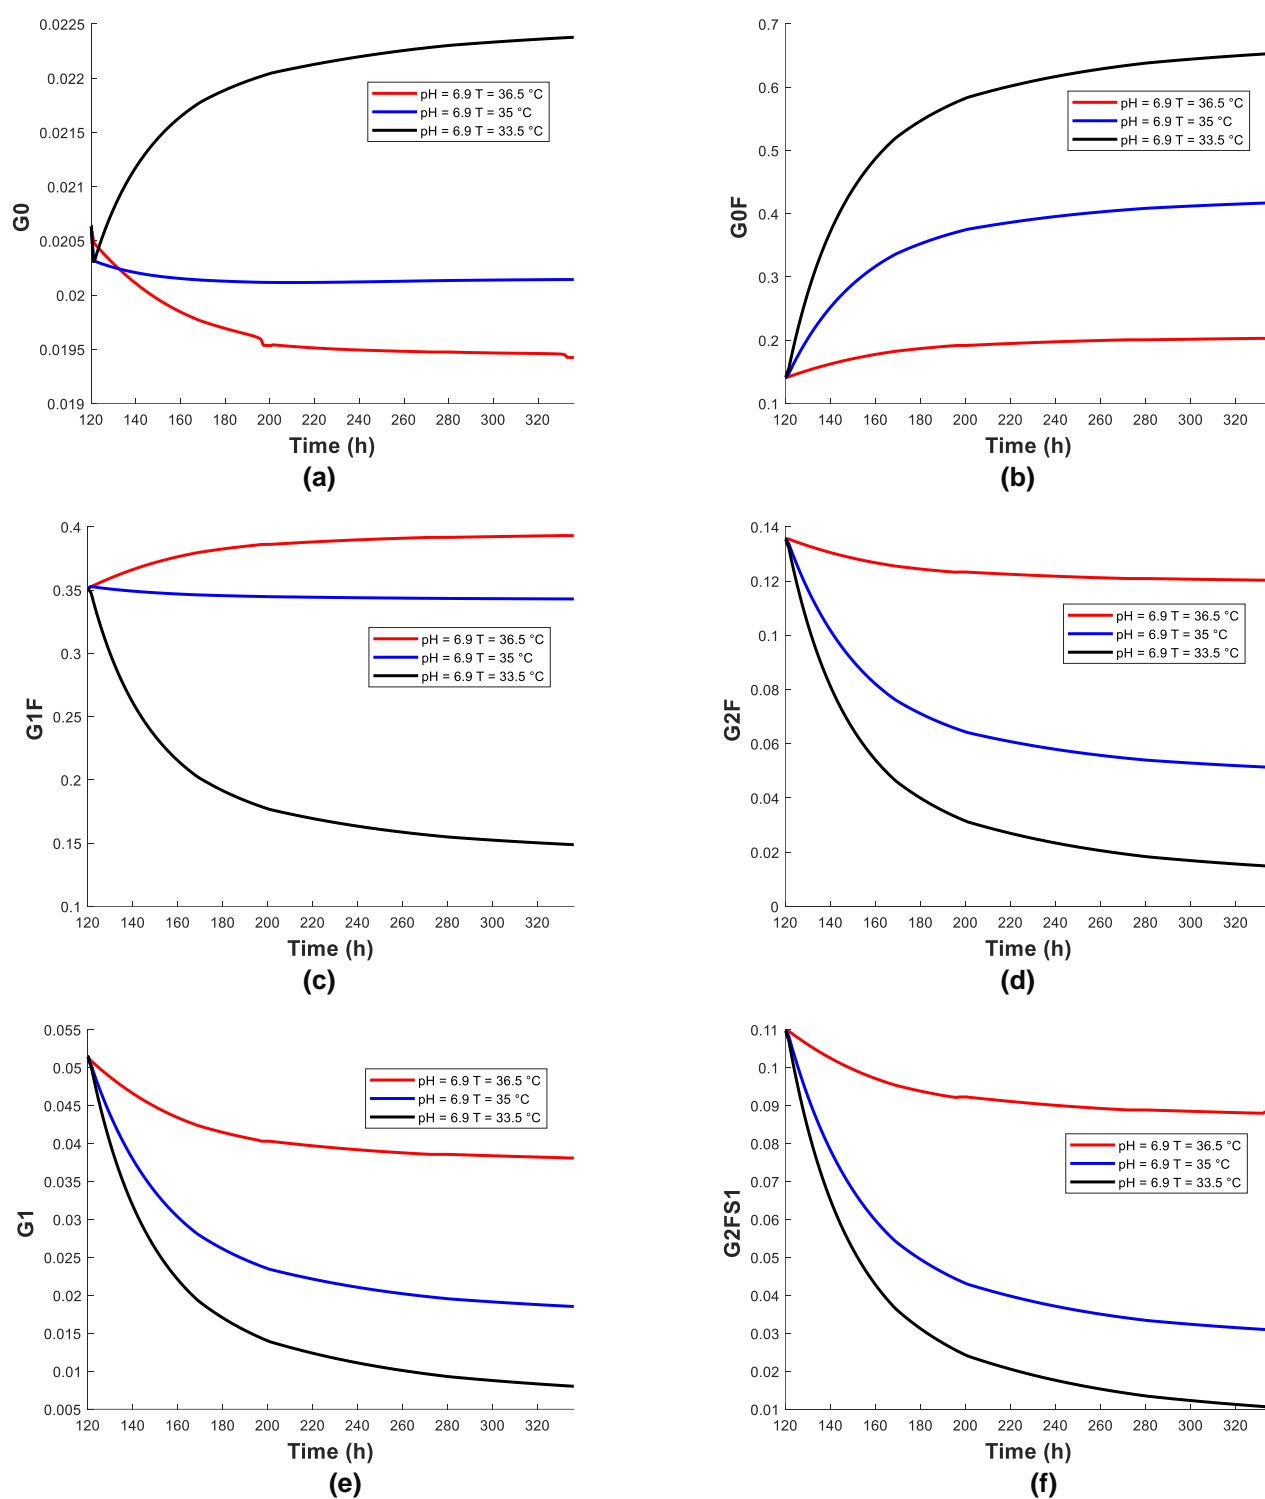

**Figure S2.** Glycan fractions under different temperature (a) G0, (b) G0F, (c) G1F, (d) G2F, (e) G1, (f) G2FS1 (pH = 6.9).

### 3. pH effect under T = 33.5 °C

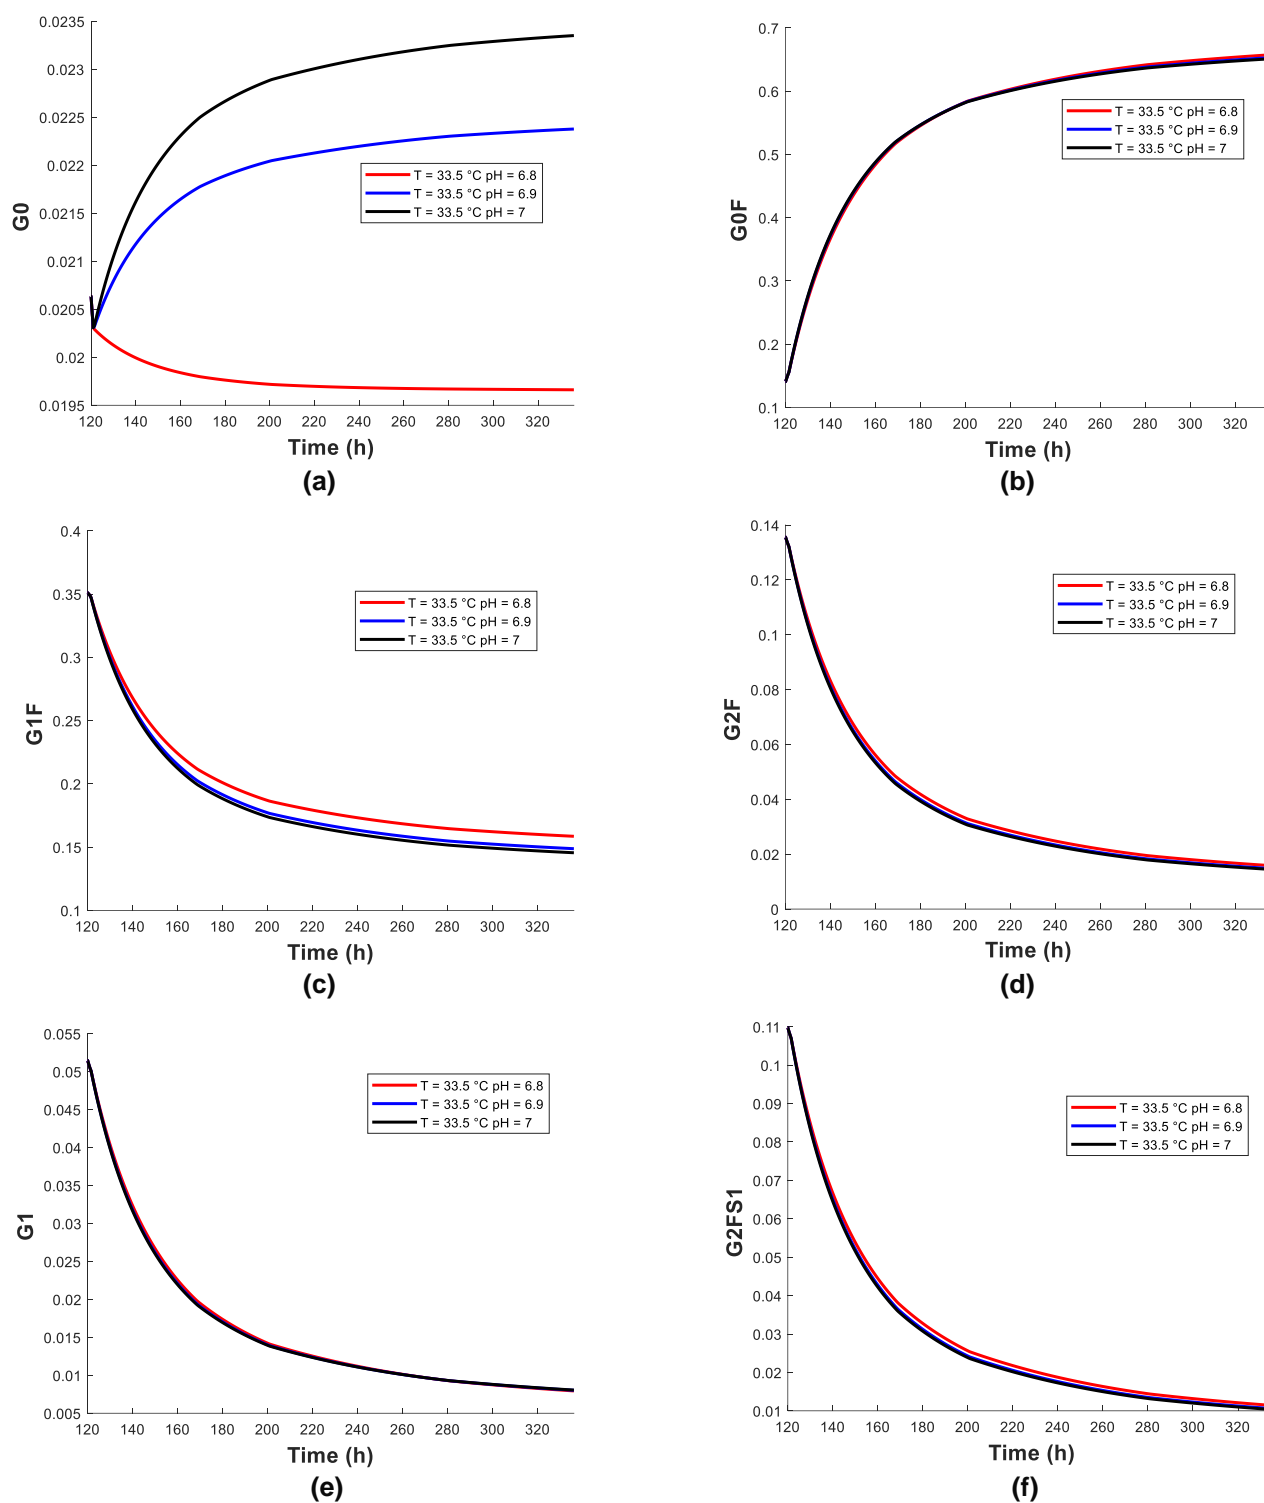

**Figure S3.** Glycan fractions under different pH (a) G0, (b) G0F, (c) G1F, (d) G2F, (e) G1, (f) G2FS1 ( $T = 33.5\text{ }^{\circ}\text{C}$ ).

#### 4. pH effect under $T = 35\text{ }^{\circ}\text{C}$

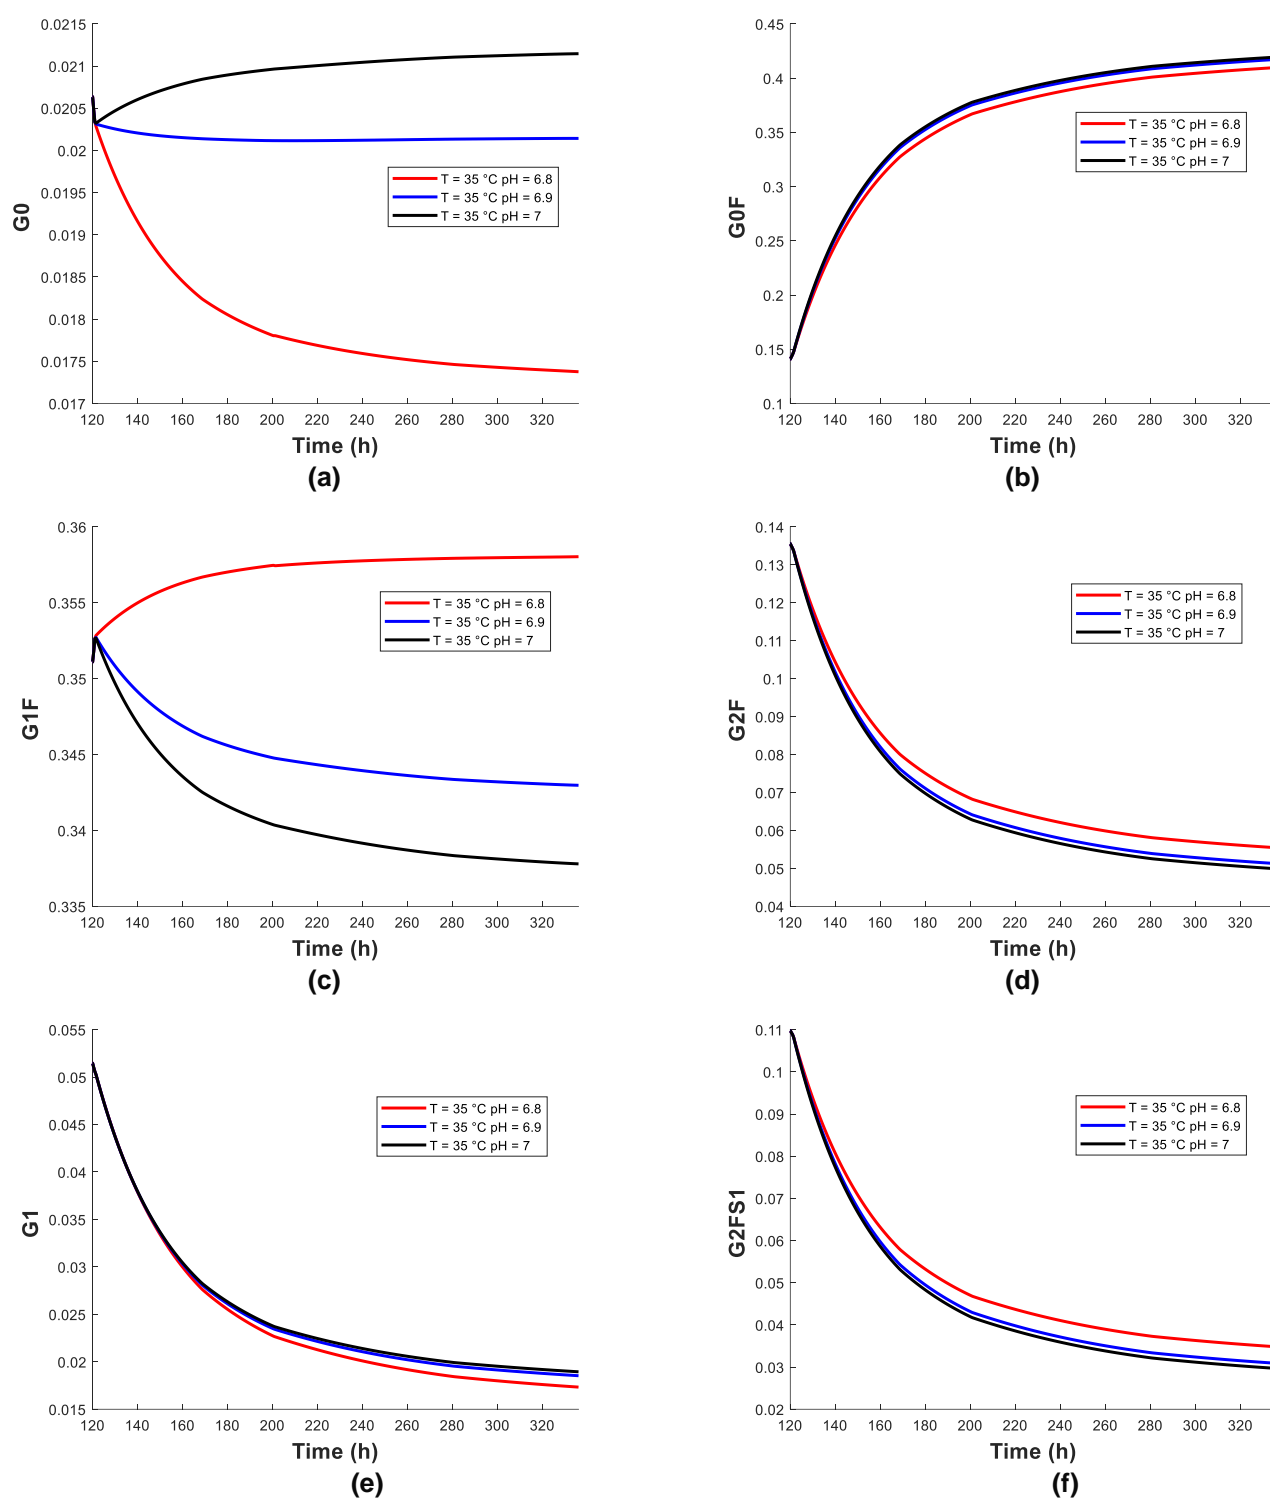

**Figure S4.** Glycan fractions under different pH (a) G0, (b) G0F, (c) G1F, (d) G2F, (e) G1, (f) G2FS1 (T = 35 °C).

## 5. Dynamic kriging fitting results

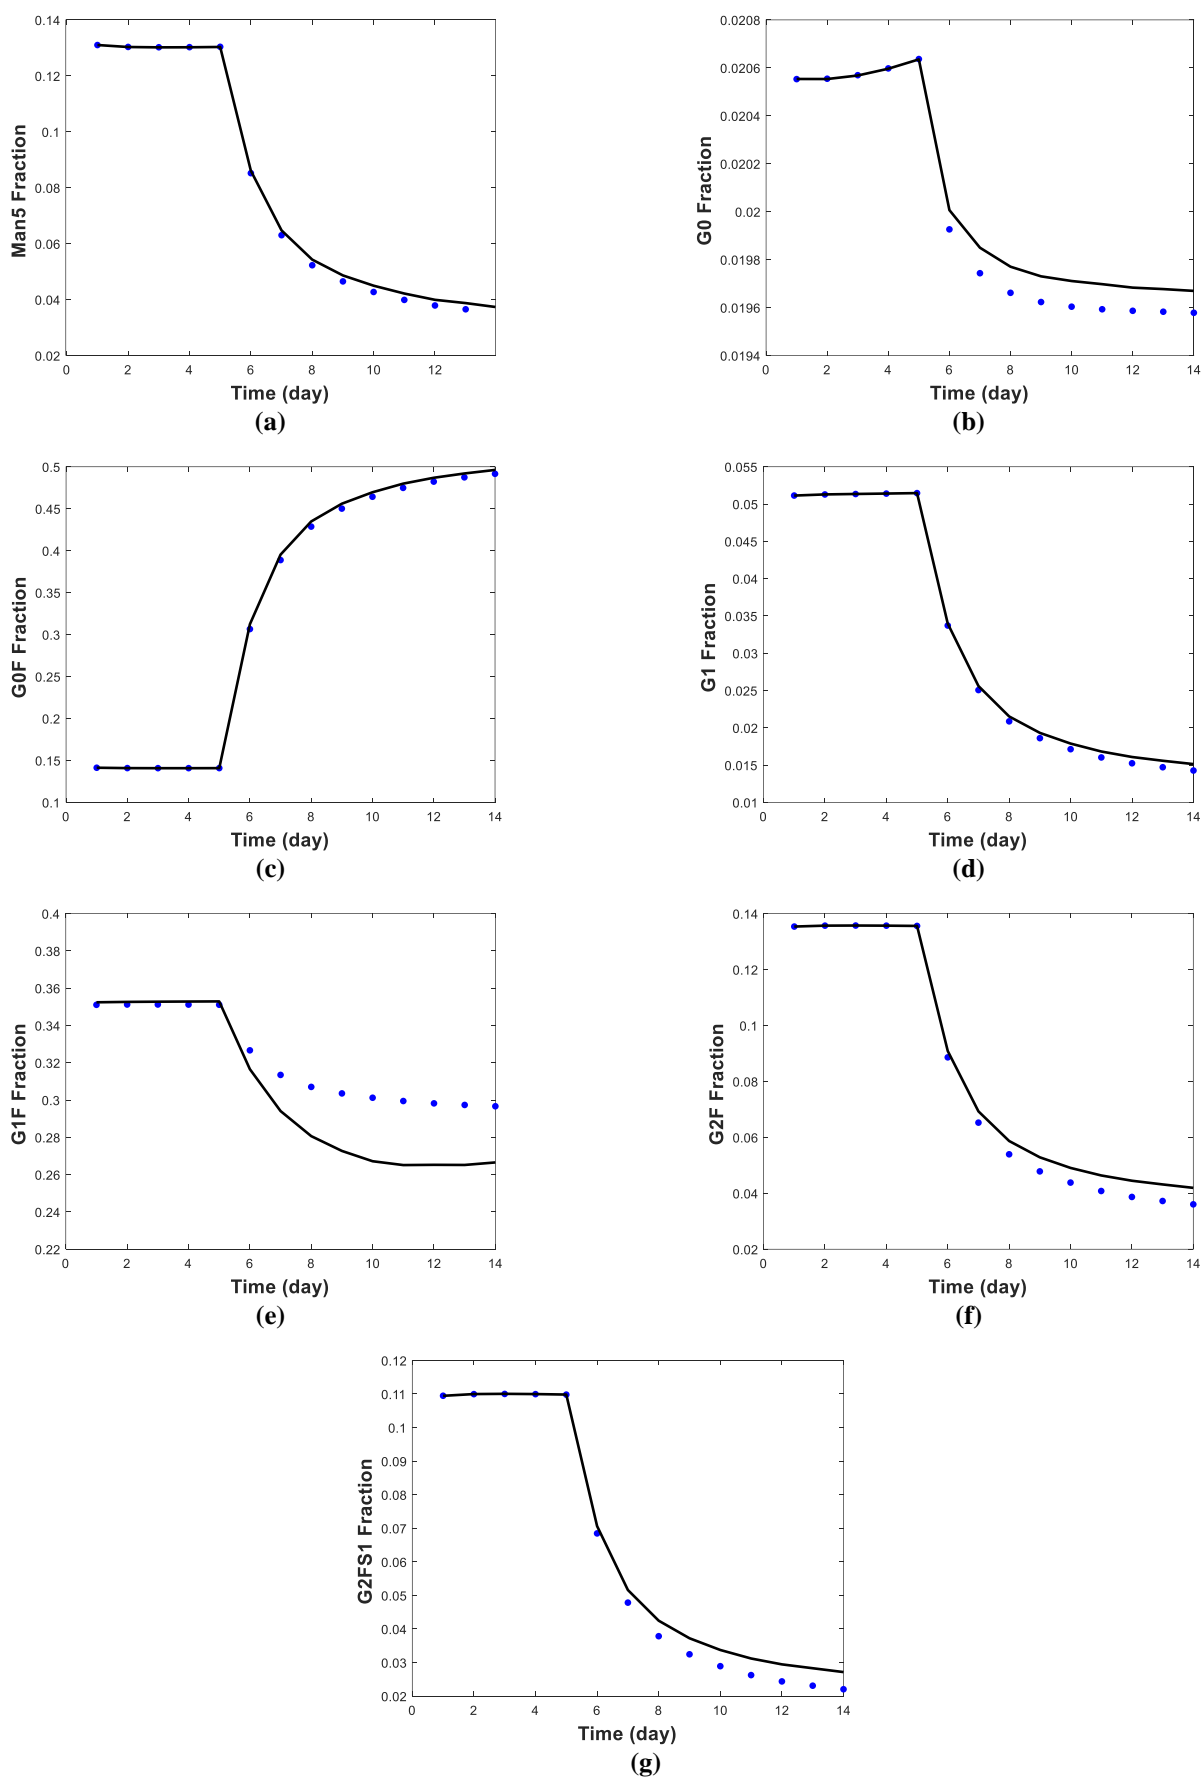

**Figure S5.** Glycan fractions fitting from day 1 by using dynamic kriging.

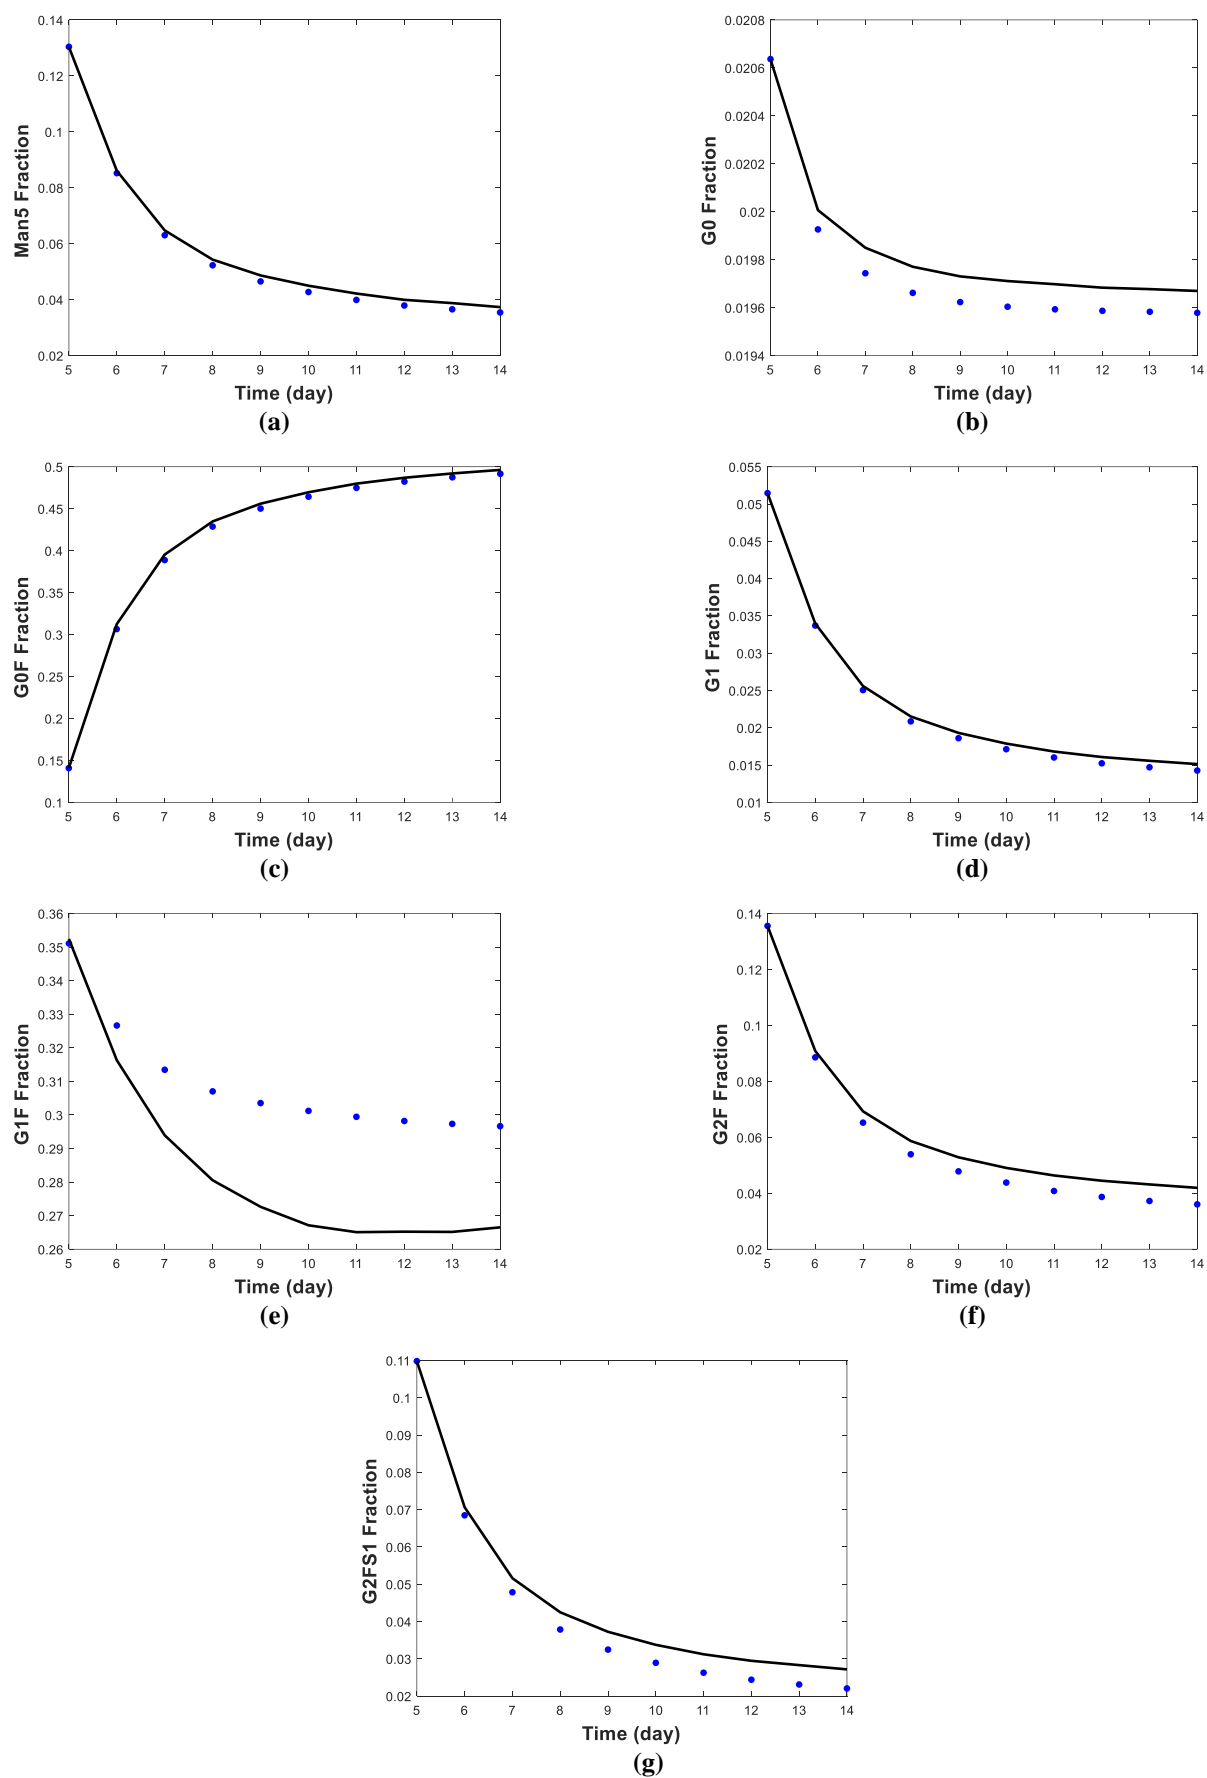

Figure S6. Glycan fraction fitting from day 5 by using dynamic kriging.



## References

1. Jimenez del Val, I.; Nagy, J. M.; Kontoravdi, C., A dynamic mathematical model for monoclonal antibody N-linked glycosylation and nucleotide sugar donor transport within a maturing Golgi apparatus. *Biotechnol Prog* **2011**, *27* (6), 1730-43.
2. Jimenez Del Val, I.; Fan, Y.; Weilguny, D., Dynamics of immature mAb glycoform secretion during CHO cell culture: An integrated modelling framework. *Biotechnol J* **2016**, *11* (5), 610-23.
